# Supplementary material
Source: Research Square preprint supplement (doi:10.21203/rs.3.rs-9706516/v1)
Supplement: Supplementary file 1 [file 13bb0d0a88b2c7afeeeb469c.xlsx]

## Sheet: Non-binary
	Supplementary table 1: Comparison of the primary and alternative classification system, across various aggregation and modeling options
	Independent (Indep.) Variable, rural calissfication with reference to the RUCC and UIC		Depend. Variable: Utilization rate, per site type	RUCC - Rural-Urban Continuum Codes (primary classification system)				UIC - Urban Influence Codes (alternative classification system)
	Aggregation Level	Cont. or Categ. Variables tested		ESTIMATE	STANDARD ERROR	t Value	Pr > |t|	ESTIMATE	STANDARD ERROR	t Value	Pr > |t|
	3-level, two of them rural: PRIMARY Indep. Variable	Continuous (3-level)	SNF	-0.1281	0.0264	-4.84	<.0001*	-0.0661	0.02795	-2.37	0.0181**
		Large rural		0.1487	0.0462	3.22	0.0013¥	0.06649	0.04476	1.49	0.1375
		Small rural		-0.272	0.0525	-5.18	<.0001*	-0.1521	0.05602	-2.71	0.0067*
		Continuous (3-level)	HHA	-0.2285	0.0366	-6.25	<.0001*	0.009656	0.0388	0.25	0.8035
		Large rural		0.0695	0.0641	1.08	0.2785	0.03604	0.06228	0.58	0.5628
		Small rural		-0.474	0.0729	-6.51	<.0001*	0.01536	0.07795	0.2	0.8438
		Continuous (3-level)	IRF	-0.1753	0.026	-6.75	<.0001*	-0.0611	0.02755	-2.22	0.0266**
		Large rural		-0.4529	0.0453	-10	<.0001*	-0.1249	0.0442	-2.83	0.0048*
		Small rural		-0.3346	0.0515	-6.49	<.0001*	-0.1126	0.05532	-2.04	0.0418**
	3-level, only one rural	Continuous (3-level)	SNF	0.0309	0.0234	1.32	0.1863	0.006835	0.0287	0.24	0.8118
		Suburban		0.2269	0.061	3.72	0.0002¥	0.06739	0.04489	1.5	0.1334
		Rural		0.0619	0.0467	1.33	0.1852	0.01819	0.05744	0.32	0.7516
		Continuous (3-level)	HHA	-0.0248	0.0325	-0.76	0.4449	0.1768	0.03968	4.45	<.0001¥
		Suburban		0.2697	0.0847	3.19	0.0015¥	0.1399	0.06209	2.25	0.0243¥
		Rural		-0.0496	0.0648	-0.76	0.4444	0.3508	0.07945	4.41	<.0001¥
		Continuous (3-level)	IRF	-0.2351	0.0227	-10.37	<.0001*	0.1147	0.02822	4.07	<.0001¥
		Suburban		-0.2062	0.0593	-3.48	0.0005*	0.2278	0.04407	5.17	<.0001¥
		Rural		-0.4702	0.0454	-10.37	<.0001*	0.2379	0.0564	4.22	<.0001¥
	4-level, three of them rural	Continuous (4-level)	SNF	-0.1353	0.0203	-6.66	<.0001*	-0.08298	0.0198	-4.19	<.0001*
		Large rural/ non-remote		0.1353	0.0463	2.92	0.0035¥	0.05106	0.04469	1.14	0.2533
		Rural and remote		-0.2013	0.0569	-3.54	0.0004*	0.1643	0.08439	1.95	0.0516
		Small rural and remote		-0.3771	0.062	-6.09	<.0001*	-0.2673	0.06037	-4.43	<.0001*
		Continuous (4-level)	HHA	-0.1685	0.0282	-5.97	<.0001*	-0.00948	0.02755	-0.34	0.7307
		Large rural/ non-remote		0.0787	0.0643	1.22	0.221	0.02724	0.06239	0.44	0.6625
		Rural and remote		-0.5231	0.0791	-6.61	<.0001*	0.1958	0.1178	1.66	0.0966
		Small rural and remote		-0.4011	0.0861	-4.66	<.0001*	-0.05033	0.08429	-0.6	0.5505
		Continuous (4-level)	IRF	-0.0999	0.0201	-4.97	<.0001*	-0.02568	0.01957	-1.31	0.1896
		Large rural/ non-remote		-0.4511	0.0455	-9.91	<.0001*	-0.1194	0.04429	-2.7	0.007
		Rural and remote		-0.3444	0.056	-6.15	<.0001*	-0.2239	0.08364	-2.68	0.0075*
		Small rural and remote		-0.3201	0.0609	-5.25	<.0001*	-0.07216	0.05984	-1.21	0.2279
	4-level, two of them rural	Continuous (4-level)	SNF	-0.0412	0.0183	-2.25	0.0243**	-0.02504	0.0215	-1.16	0.2444
		Suburban		0.2228	0.0603	3.7	0.0002¥	0.06019	0.04633	1.3	0.194
		Large rural		0.2135	0.0493	4.33	<.0001¥	0.1094	0.05563	1.97	0.0493¥¥
		Small rural		-0.2059	0.0553	-3.72	0.0002*	-0.1084	0.06532	-1.66	0.0971
		Continuous (4-level)	HHA	-0.1009	0.0253	-3.98	<.0001*	0.04599	0.02982	1.54	0.1231
		Suburban		0.2645	0.0838	3.16	0.0016¥	0.1777	0.0644	2.76	0.0058¥
		Large rural		0.1463	0.0685	2.14	0.0326¥¥	0.1628	0.07733	2.11	0.0353¥¥
		Small rural		-0.3955	0.0769	-5.14	<.0001*	0.1443	0.09081	1.59	0.1121
		Continuous (4-level)	IRF	-0.1539	0.0178	-8.63	<.0001*	0.01762	0.0212	0.83	0.4058
		Suburban		-0.2051	0.0592	-3.46	0.0005*	0.2914	0.04546	6.41	<.0001¥
		Large rural		-0.5125	0.0484	-10.59	<.0001*	0.08296	0.05458	1.52	0.1286
		Small rural		-0.3955	0.0544	-7.28	<.0001*	0.09878	0.0641	1.54	0.1234
	9-level – continuous	Continuous (9-level)	SNF	-0.01322	0.00882	-1.5	0.134	-0.00472	0.009452	-0.5	0.6173
		Continuous (9-level)	HHA	-0.02841	0.01223	-2.32	0.0202**	0.0328	0.0131	2.5	0.0123¥¥
		Continuous (9-level)	IRF	-0.05449	0.008641	-6.31	<.0001*	0.005772	0.009316	0.62	0.5356
	Legend: SNF: Skilled Nursing Facilities; HHA: Home Health Agencies; IRFs: Inpatient Rehabilitation Facilities. RUCC: Rural-Urban Continuum Codes. UIC: Urban Influence Codes.
	Keys: *Statistically significant for lower rural utilization (99% conficence). ***Statistically significant for lower rural utilization (95% conficence).
	¥: Statistically significant for higher rural utilization (99% conficence). ¥¥: Statistically significant for higher rural utilization (95% conficence)
