# Supplementary material
Source: Research Square preprint supplement (doi:10.21203/rs.3.rs-9706516/v1)
Supplement: Supplementary file 1 [file 922136d95b0e0e9d23a2ceea.docx]

**Supplementary Appendix 1**

**Data Source: How the therapy utilization data were collected and its limitations**

The primary data source of therapy data was the Medicare Post-Acute Care and Hospice Provider Utilization and Payment Public Use File (PAC PUF), which report summary data by provider. Although the PAC PUF has utilization data that are comparable across US geographic regions, it is important to provide details about the underlying data collected and how data were analyzed for this dataset, specifically for the year here analyzed (2022), and any applicable limitations. It is also worth noting that the file only includes data for Part A Medicare fee-for-service stays.

The information reported here is derived from the Methodology document of the PAC PUF files released in 2024 (<https://data.cms.gov/provider-summary-by-type-of-service/medicare-post-acute-care-hospice/medicare-post-acute-care-and-hospice-by-geography-provider>).

**Overview of the therapy utilization data collection for the PAC PUF (2022 data) and its limitations**

There are differences in the data collection requirements for each type of PAC provider. Also, it is important to note the therapy minutes are not exhaustive relative to those delivered. Overall, caution should be taken when using and comparing utilization rates across provider types. Yet, relative comparisons across geographies (e.g. rural and urban) are reasonable because the documentation requirements were the same for a given time across the USA. How the data are collected by provider type and any inherent limitations are detailed below.

*Data collection for IRFs and its limitations*

The PAC PUF calculates the volume (i.e., minutes) of therapy services by discipline type delivered in IRFs from the IRF Patient Assessment Instrument (IRF-PAI). Completion of the IRF-PAI is required for each Medicare patient discharged from an IRF. Questions O0401 and O0402 report the total minutes of therapy delivered by discipline type during the first two weeks of care. The therapy minutes patients delivered after the initial two weeks (for patients that had a longer than two-weeks stay) were not documented, and thus not included in the PAC PUF data we analyzed. In the creation of the PAC PUF IRF files, available therapy data are restricted to Medicare FFS beneficiaries and data are aggregated without any adjustment for variations in lengths of stay. For example, a patient with a length-of-stay of 21 days will have therapy minutes data for only 14 days. Thus, there is missing therapy data for patients with stays longer than 14 days. Further, we note that Maryland has adopted an all-payer payment system for their hospitals and some hospital-based units that offer intensive rehabilitation in Maryland do not submit IRF-PAI data, and thus are not included in the PAC PUF data.

*Data collection for SNFs and its limitations*

The PAC PUF calculates the minutes of therapy services by discipline type delivered in SNFs from the Long-Term Care Minimum Data Set 3.0 (MDS). The assessment variable (O0425) reports therapy minutes performed for the entire stay covered by Medicare’s Part A SNF benefit, but this variable is only reported on MDS Part A Discharge assessments, and CMS does not always require a discharge assessment to be completed (e.g., not when the patient dies while at the SNF). Further, skilled nursing care provided in critical access hospitals, which are primarily designed to serve rural locations, are not required to submit MDS data, and thus are not included in the PAC PUF data. Therefore, therapy minutes and their utilization rates are not exhaustive for SNFs, thereby not comparable to that of other facility types (i.e. HHAs or IRFs). Relative cross-geographical comparisons (e.g., rural-urban differences) may be reasonable because the documentation requirements are the same across geographies with the exception of swing beds in critical care hospitals.

*Data collection for HHAs*

Services for HHAs were obtained from the revenue center files on the Chronic Conditions Data Warehouse and include the following revenue center codes: 0420-0429 (physical therapy), 0430-0439 (occupational therapy), 0440-0449 (speech language pathology). The data derived from theses codes were all transformed and presented into minutes of therapy for each of these professions.
