# Supplementary material
Source: Research Square preprint supplement (doi:10.21203/rs.3.rs-9706516/v1)
Supplement: Supplementary file 2 [file bbe5154c6cb9849b3c0ca8c1.docx]

**Supplementary Appendix 2:**

**Rationale for the Covariate types used**

**Demographics of Fee-for-Service (FFS) Medicare beneficiaries:**

Medicare FFS beneficiaries vary in their socio-demographics and clinical characteristics by county, which may affect utilization patterns beyond rural or urban location,1-3 beyond the overall socio-demographics and medical diagnoses aggregated into the *Hierarchical Condition Category Severity Score*. Finally, the number of enrollees in the Medicare FFS program *vs* Medicare Advantage Plans vary across rural and urban geographies and over time,6 7 and therefore are controlled for in analyses.

**Rates of key chronic conditions of the Medicare FFS beneficiaries**

Stroke prevalence varies substantially across geographies, including for Medicare FFS beneficiaries,4 and is one prevalent condition for post-acute care whose outcomes vary by therapy intensity level in IRFs *vs* SNFs.5 We also account for other major neurological, cardiac, and musculoskeletal conditions prevalent among Medicare FFS beneficiaries.

**Medicare spending, adjusted per region (beneficiaries Part A and B):**

Healthcare spending, even adjusted for varying payment rates across regions,8 varies substantially across the USA and for FFS Medicare enrollees.9 While regional disparities have been decreasing,10 including for some post-acute providers such as Home Health Agencies,11 they are still prevalent and should be controlled for,1 12 including for acute care spending as a likely antecedent of post-acute care utilization.

**Disability statistics, e.g., poverty and employment – county-level:**

Disability rates are unevenly distributed between geographies, especially rural and urban.13-16 Also, where health services were available, many people with disabilities may not be able to afford the cost to seeking healthcare,17 18 because of the extra cost of living with disability.19 20 People with disabilities often have lower employment rates and income,15 21 which can affect the utilization for healthcare beyond need, even for the elderly who may forego health care due to out-of-pocket costs.15

**Community-level health indicators (e.g., health access** *&* **socio-economic development):**

Arising from multiple social determinants, people with disabilities often have poorer health, increased health risks (e.g. obesity), and poorer health care access, including for preventive care.15 17 18 22 23 These disparities are more pronounced in rural communities, which often experience a higher prevalence of poorer social determinants of health.13 17 24-26 Under-utilization of preventive or other health services (due to lack of insurance23, lower perceived need for care25 or lower disposable income15 21) may also lead to community-level disparities in the onset or aggravation of health conditions or disabilities, including secondary.27 28 Hence, community-level health and social determinants of health that may be associated to disability, rehabilitation needs, and underserved communities are controlled for.

**References**

1. Mroz T. GL, Wong J., et. al. Variation in Use of Home Health Care among Fee-for-Service Medicare Beneficiaries by Rural-Urban Status and Geographic Region: Assessing the Potential for Unmet Need. . *Policy Brief #169 2020 WWAMI Rural Health Research Center, University of Washington Seattle, WA* 2020

2. Centers for Medicare & Medicaid Services. Rural-Urban Disparities in Health Care in Medicare, 2022.

3. Xian Y, Thomas L, Liang L, et al. Unexplained Variation for Hospitals' Use of Inpatient Rehabilitation and Skilled Nursing Facilities After an Acute Ischemic Stroke. *Stroke* 2017;48(10):2836-42. doi: 10.1161/strokeaha.117.016904 [published Online First: 2017/08/24]

4. Centers for Medicare & Medicaid Services - Office of Minority Health. Stroke Disparities in Medicare Fee-For-Service Beneficiaries

5. Hong I, Goodwin JS, Reistetter TA, et al. Comparison of Functional Status Improvements Among Patients With Stroke Receiving Postacute Care in Inpatient Rehabilitation vs Skilled Nursing Facilities. *JAMA network open* 2019;2(12):e1916646. doi: 10.1001/jamanetworkopen.2019.16646 [published Online First: 2019/12/05]

6. Park S, Meyers DJ, Langellier BA. Rural Enrollees In Medicare Advantage Have Substantial Rates Of Switching To Traditional Medicare. *Health affairs (Project Hope)* 2021;40(3):469-77. doi: 10.1377/hlthaff.2020.01435 [published Online First: 2021/03/02]

7. Freed M BJ, Damico A, Neuman T,. Medicare Advantage in 2022: Enrollment Update and Key Trends: KFF; [Available from: <https://www.kff.org/medicare/issue-brief/medicare-advantage-in-2022-enrollment-update-and-key-trends/#:~:text=In%202022%2C%20nearly%20half%20of,(19%25%20to%2048%25>) accessed January 25, 2023.

8. Centers for Medicare & Medicaid Services. Medicare Geographic Variation - by National, State & County [Available from: <https://data.cms.gov/summary-statistics-on-use-and-payments/medicare-geographic-comparisons/medicare-geographic-variation-by-national-state-county>.

9. Cooper Z, Stiegman O, Ndumele CD, et al. Geographical Variation in Health Spending Across the US Among Privately Insured Individuals and Enrollees in Medicaid and Medicare. *JAMA network open* 2022;5(7):e2222138. doi: 10.1001/jamanetworkopen.2022.22138 [published Online First: 2022/07/21]

10. Zhang Y, Li J. Geographic Variation In Medicare Per Capita Spending Narrowed From 2007 To 2017. *Health affairs (Project Hope)* 2020;39(11):1875-82. doi: 10.1377/hlthaff.2020.00188 [published Online First: 2020/11/03]

11. Sood N, Yang Z, Huckfeldt P, et al. Geographic Variation in Medicare Fee-for-Service Health Care Expenditures Before and After the Passage of the Affordable Care Act. *JAMA health forum* 2021;2(12):e214122. doi: 10.1001/jamahealthforum.2021.4122 [published Online First: 2022/08/18]

12. Schuldt RF, Lallier ALM, Chen HF, et al. Geographic variation in Medicare home health expenditures. *The American journal of managed care* 2022;28(7):322-28. doi: 10.37765/ajmc.2022.89179 [published Online First: 2022/07/20]

13. Zhao G, Okoro CA, Hsia J, et al. Prevalence of Disability and Disability Types by Urban-Rural County Classification-U.S., 2016. *American journal of preventive medicine* 2019;57(6):749-56. doi: 10.1016/j.amepre.2019.07.022 [published Online First: 2019/11/23]

14. Sage R, Ward B, Myers A, et al. Transitory and Enduring Disability Among Urban and Rural People. *The Journal of rural health : official journal of the American Rural Health Association and the National Rural Health Care Association* 2019;35(4):460-70. doi: 10.1111/jrh.12338 [published Online First: 2018/12/20]

15. Okoro CA, Hollis ND, Cyrus AC, et al. Prevalence of Disabilities and Health Care Access by Disability Status and Type Among Adults - United States, 2016. *MMWR Morbidity and mortality weekly report* 2018;67(32):882-87. doi: 10.15585/mmwr.mm6732a3 [published Online First: 2018/08/17]

16. McDaniel JT. Geographic Distribution of Disability Among Older Veterans, United States, 2013-2017. *Preventing chronic disease* 2020;17:E35. doi: 10.5888/pcd17.190340 [published Online First: 2020/05/15]

17. Dassah E, Aldersey H, McColl MA, et al. Factors affecting access to primary health care services for persons with disabilities in rural areas: a "best-fit" framework synthesis. *Global health research and policy* 2018;3:36. doi: 10.1186/s41256-018-0091-x [published Online First: 2019/01/04]

18. Wong JL, Alschuler KN, Mroz TM, et al. Identification of targets for improving access to care in persons with long term physical disabilities. *Disability and health journal* 2019;12(3):366-74. doi: 10.1016/j.dhjo.2019.01.002 [published Online First: 2019/03/19]

19. Mitra S, Palmer M, Kim H, et al. Extra costs of living with a disability: A review and agenda for research. *Disability and health journal* 2017;10(4):475-84. doi: 10.1016/j.dhjo.2017.04.007 [published Online First: 2017/05/16]

20. Morris ZA, McGarity SV, Goodman N, et al. The Extra Costs Associated With Living With a Disability in the United States. *Journal of Disability Policy Studies* 2021;33(3):158-67. doi: 10.1177/10442073211043521

21. Stevens AC, Carroll DD, Courtney-Long EA, et al. Adults with One or More Functional Disabilities - United States, 2011-2014. *MMWR Morbidity and mortality weekly report* 2016;65(38):1021-5. doi: 10.15585/mmwr.mm6538a1 [published Online First: 2016/09/30]

22. Iezzoni LI. Cancer detection, diagnosis, and treatment for adults with disabilities. *The Lancet Oncology* 2022;23(4):e164-e73. doi: 10.1016/s1470-2045(22)00018-3 [published Online First: 2022/04/01]

23. Iezzoni LI, Frakt AB, Pizer SD. Uninsured persons with disability confront substantial barriers to health care services. *Disability and health journal* 2011;4(4):238-44. doi: 10.1016/j.dhjo.2011.06.001 [published Online First: 2011/10/22]

24. Ipsen C, Hall JP, Lui J. Editorial: Rural disability and community participation. *Frontiers in rehabilitation sciences* 2022;3:1049578. doi: 10.3389/fresc.2022.1049578 [published Online First: 2022/11/05]

25. Gimm G, Ipsen C. Examining rural-urban disparities in perceived need for health care services among adults with disabilities. *Frontiers in rehabilitation sciences* 2022;3:875978. doi: 10.3389/fresc.2022.875978 [published Online First: 2022/10/04]

26. Del Brutto OH, Mera RM, Recalde BY, et al. On the Association Between Social Determinants of Health and Disability in Stroke-Free Older Adults Living in Rural Settings. The Three Villages Study. *Journal of primary care & community health* 2020;11:2150132720961265. doi: 10.1177/2150132720961265 [published Online First: 2020/10/02]

27. Hollar DW, Jr. Disability and health outcomes in geospatial analyses of Southeastern U.S. county health data. *Disability and health journal* 2017;10(4):518-24. doi: 10.1016/j.dhjo.2017.01.003 [published Online First: 2017/02/28]

28. Moharić M. Research on prevalence of secondary conditions in individuals with disabilities: an overview. *International journal of rehabilitation research Internationale Zeitschrift fur Rehabilitationsforschung Revue internationale de recherches de readaptation* 2017;40(4):297-302. doi: 10.1097/mrr.0000000000000255 [published Online First: 2017/09/28]
